# Supplementary material for: A gold nanoparticle-intercalated mesoporous silica-based nanozyme for the selective colorimetric detection of dopamine
Source: Royal Society of Chemistry journal article supplement (doi:10.1039/c9na00508k), 2019-12-19
Supplement: c9na00508k1.pdf [file c9na00508k1.pdf]

**Electronic Supplementary Information**

**Gold Nanoparticle Intercalated Mesoporous Silica based  
Nanozymes for Selective Colorimetric Detection of Dopamine**

Shounak Ray, Rima Biswas, Rumeli Banerjee, and Papu Biswas

Department of Chemistry, Indian Institute of Engineering Science and Technology, Shibpur,  
Howrah 711 103, West Bengal, India.

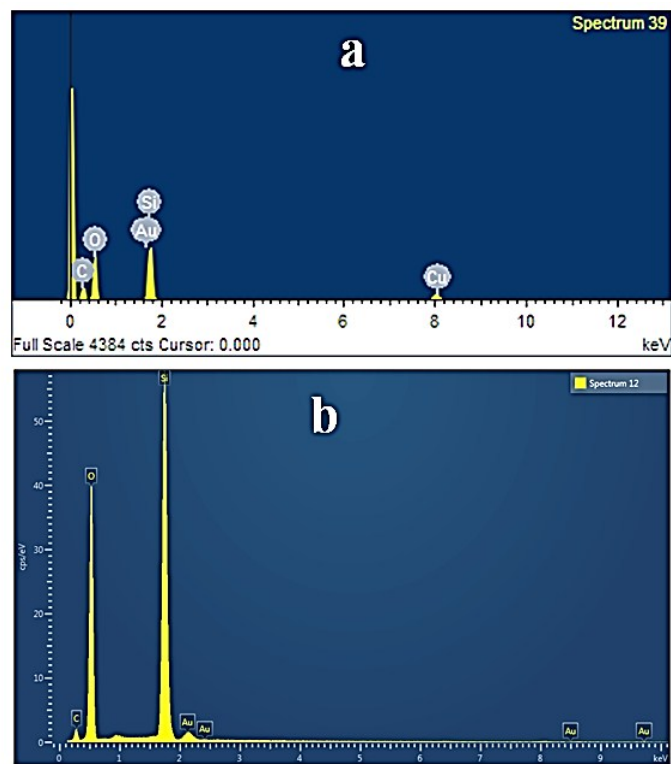

**Fig. S1** (a) TEM EDX Analysis and (b) SEM EDX Analysis of AuMS

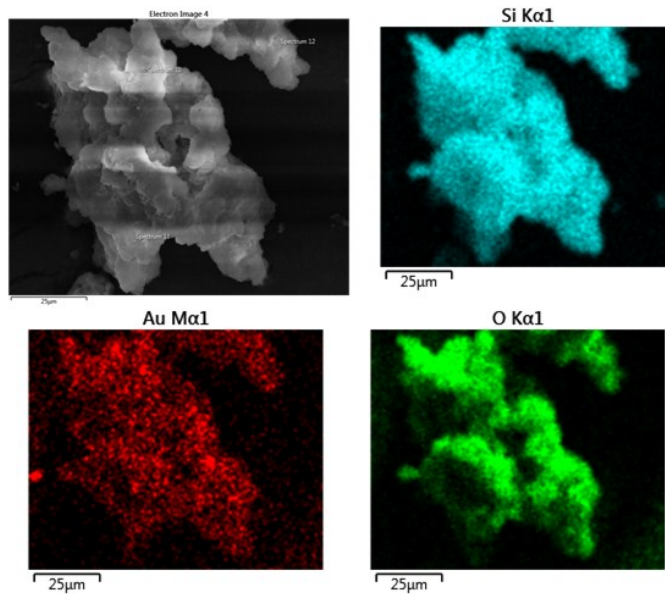

**Fig. S2** EDS Mapping of AuMS Catalyst Particles Used to Measure the Dispersion of Au Within the Catalyst

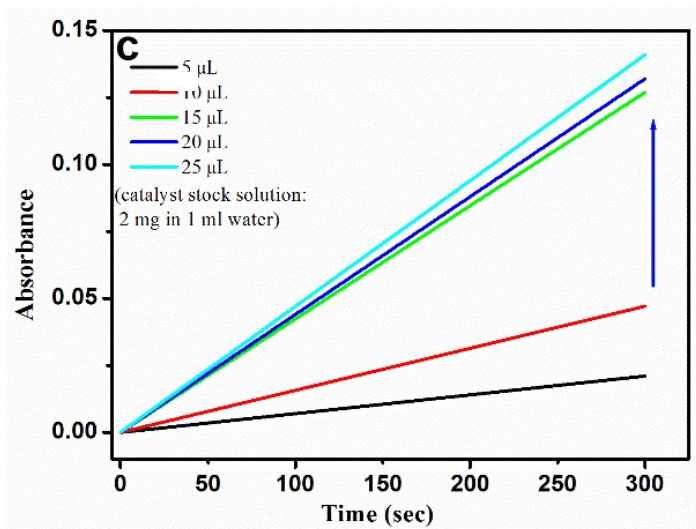

**Fig. S3** Optimization of the amount of catalyst on catalytic oxidation of TMB in presence of AuMS
